# Supplementary material for: Anti-Fibrotic Effects of Class I HDAC Inhibitor, Mocetinostat Is Associated with IL-6/Stat3 Signaling in Ischemic Heart Failure
Source: MDPI journal article supplement (doi:10.3390/ijms160511482), 2015-05-19
Supplement: s1 [file s1]

## Supplementary Information

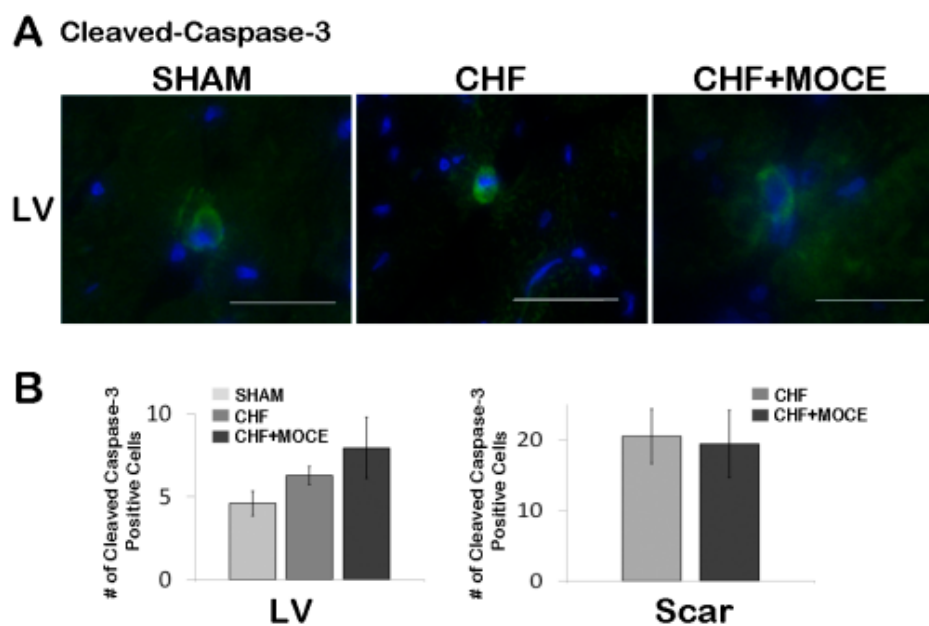

**Figure S1.** Cleaved-Caspase 3 levels were unchanged in Mocetinostat treated animals. Cross section of LV and Scar tissue were stained with Cleaved-Caspase 3 antibody in sham, Mocetinostat treated and untreated CHF hearts. Number of positive cells was counted in LV (**A**) and scar (**B**). Error bars indicate SE. Scale bar 20  $\mu$ m,  $n = 4$ . MOCE, Mocetinostat; CHF, congestive heart failure.
